# Supplementary material for: Cationic copolymer enhances 8–17 DNAzyme and MNAzyme activities
Source: Royal Society of Chemistry journal article supplement (doi:10.1039/d0bm00428f), 2020-01-01
Supplement: d0bm00428f1.pdf [file d0bm00428f1.pdf]

## **Supplementary Information**

### **Cationic copolymer enhances 8-17 DNzyme and MNzyme activities**

*Krittika Rudeejaronrungs, Orakan Hanpanich, Ken Saito, Naohiko Shimada,  
Atsushi Maruyama\**

School of Life Science and Technology, Tokyo Institute of Technology, 4259-B57  
Nagatsuta-cho, Midori, Yokohama, Kanagawa 226-8501, Japan

\*Corresponding Author

*E-mail:* amaruyama@bio.titech.ac.jp

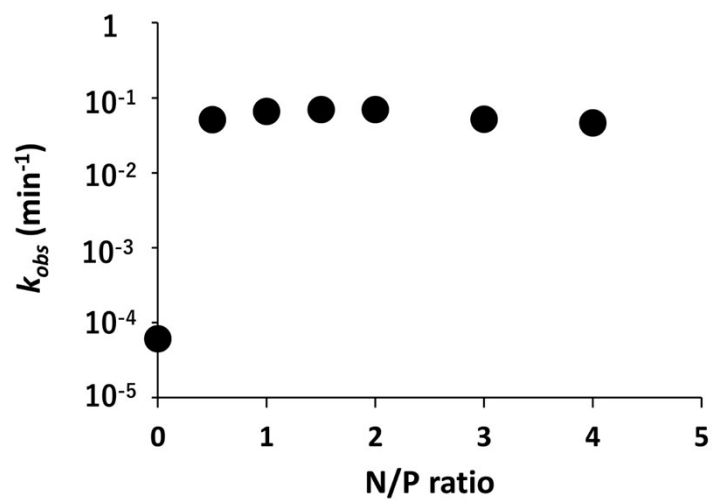

**Figure S1** N/P ratio dependence of 8-17 MNase multiple-turnover reactivity,  $k_{obs}$ , with miR-21 target. Experimental condition: 35 °C, pH 7.3, in the presence of 0.2 mM  $\text{Pb}^{2+}$ .

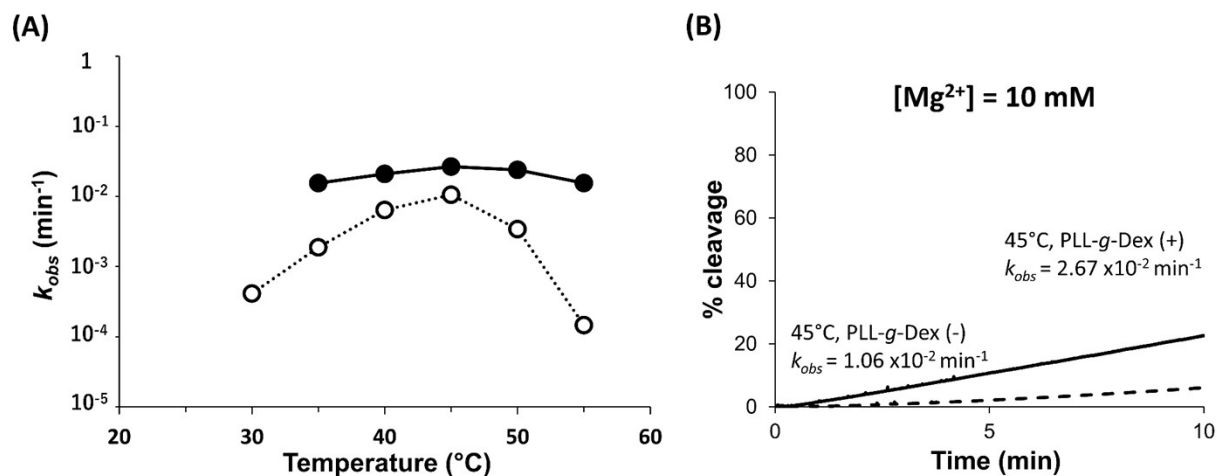

**Figure S2 8-17** MNAzyme multiple-turnover reactions with 29-nt-long DNA target at pH 7.3. (A) Temperature dependence of  $k_{obs}$ , estimated in 10 mM  $\text{Mg}^{2+}$  in the absence (dotted line) and presence (N/P=2) (solid line) of PLL-g-Dex. (B) Percent cleavage of substrate at the optimal temperature in the absence (dotted line) and presence (N/P=2) (solid line) of PLL-g-Dex with 10 mM  $\text{Mg}^{2+}$ .
